# Supplementary material for: Effect of Chronic Hyperglycemia on Glucose Metabolism in Subjects With Normal Glucose Tolerance
Source: Oxford University Press journal article supplement (doi:10.2337/db18-0439), 2018-09-13

SUPPLEMENTARY DATA

**Supplementary Figure S1.** Plasma glucose (A), plasma radioactivity DPM (B) and plasma glucose specific activity (C) during the 30 minutes prior to the start of the insulin clamp at baseline (circles) and following three days of glucose infusion (triangles). \*\*\*P<0.001 vs baseline; n=20 subjects.

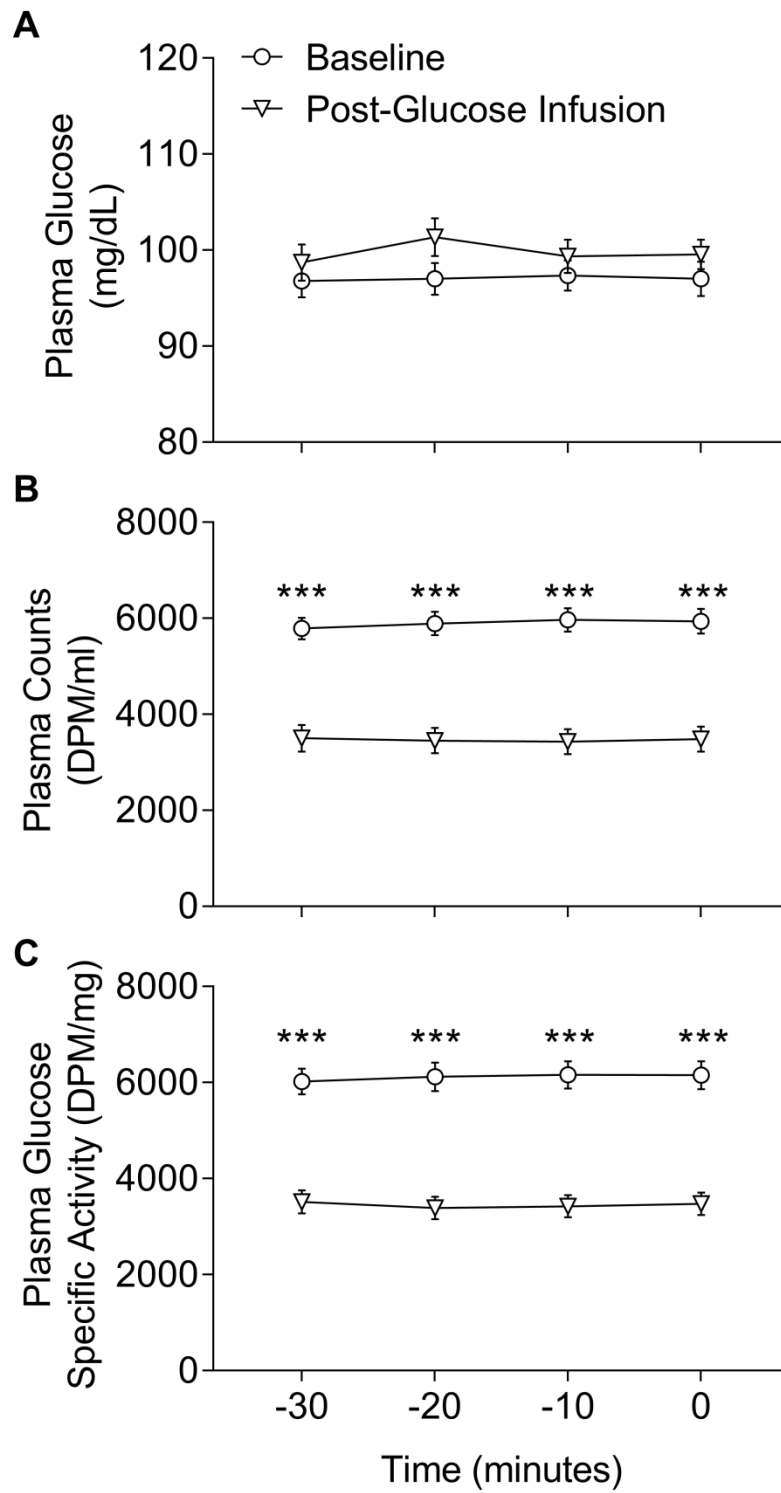

SUPPLEMENTARY DATA

**Supplementary Figure S2.** Basal (black circles) and insulin-stimulated (open circles) skeletal muscle glucose-6-phosphate, glycogen synthase phosphorylation and GSK3 $\beta$  phosphorylation in FH-, FH+ and CON subjects at Baseline and following three days of glucose or saline infusion.

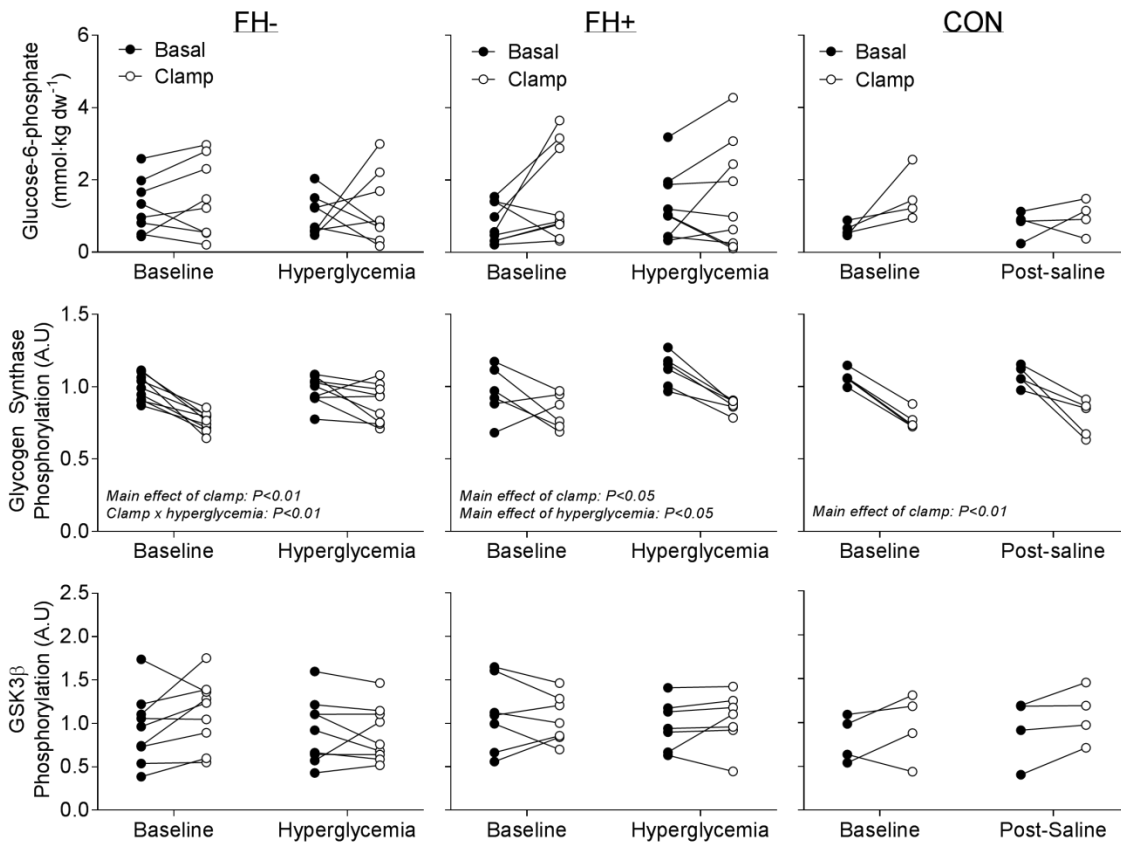

Supplement: db180439supplementarydata.pdf [file db180439supplementarydata.pdf]
